# Supplementary figures and images for: A Randomized Placebo-Controlled Trial of Varenicline for Smoking Cessation Allowing Flexible Quit Dates
Source: PubMed Central journal article supplement — Nicotine Tob Res. 2011 Nov 11;14(3):343–50. doi: 10.1093/ntr/ntr220 (PMC3281242; doi:10.1093/ntr/ntr220), 2011-11-11

Supplemental Figure 2.

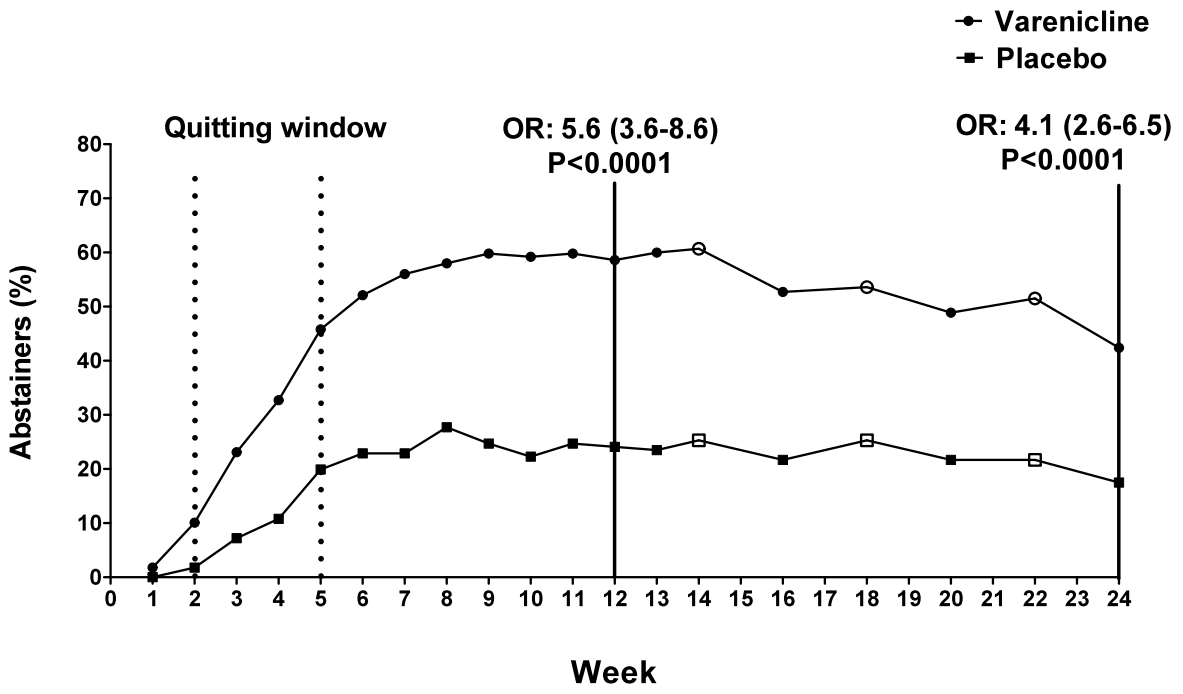

Supplement: supp_ntr220_NTR_2011_070_revision_1_Suppl_Fig_2.pdf [file supp_ntr220_NTR_2011_070_revision_1_Suppl_Fig_2.pdf]

**Supplemental Figure 1.**

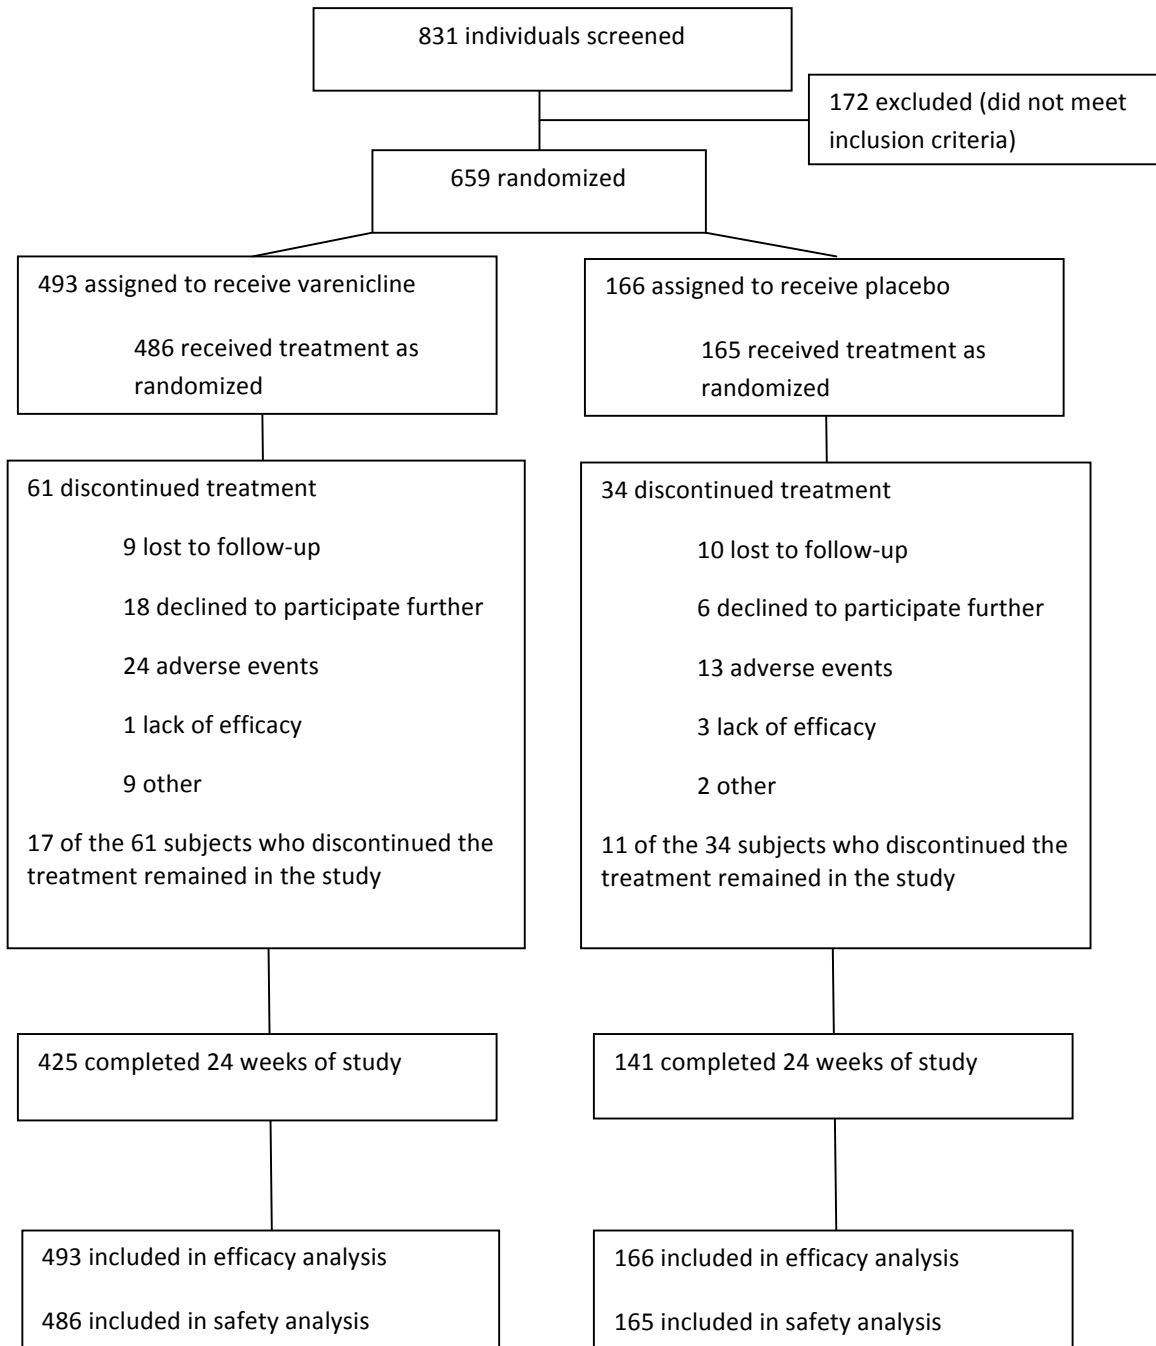

Supplement: supp_ntr220_NTR_2011_070_revision_1_Suppl_figure_1.pdf [file supp_ntr220_NTR_2011_070_revision_1_Suppl_figure_1.pdf]
